# Supplementary material
Source: PubMed Central journal article supplement (PMC5437816)

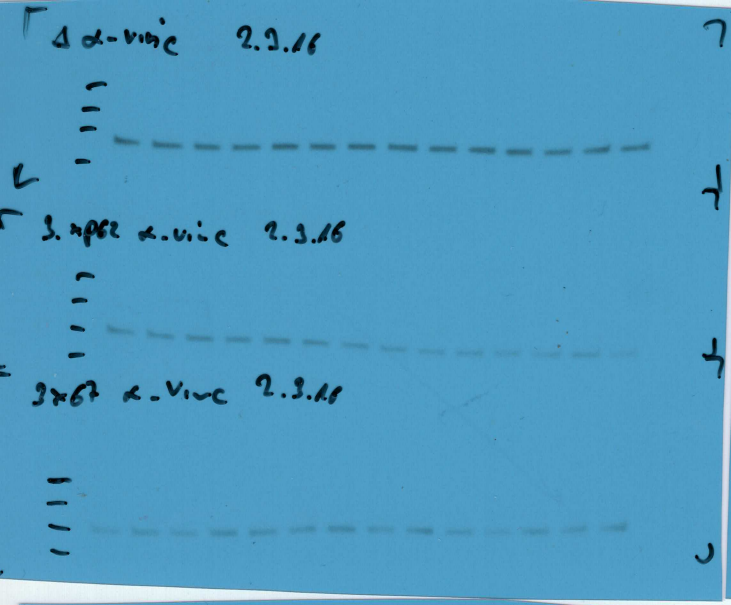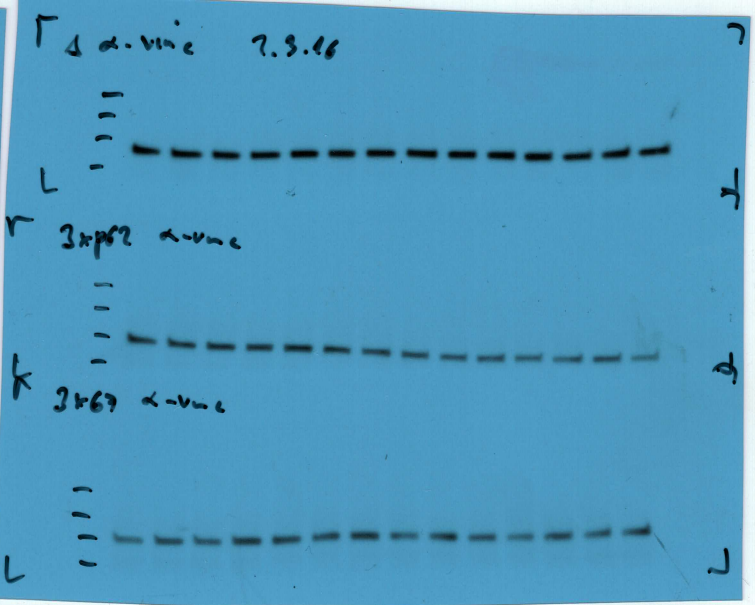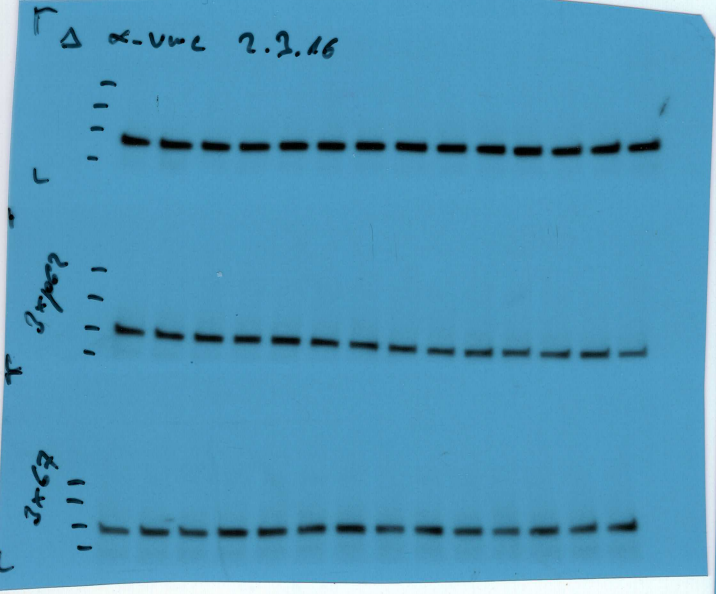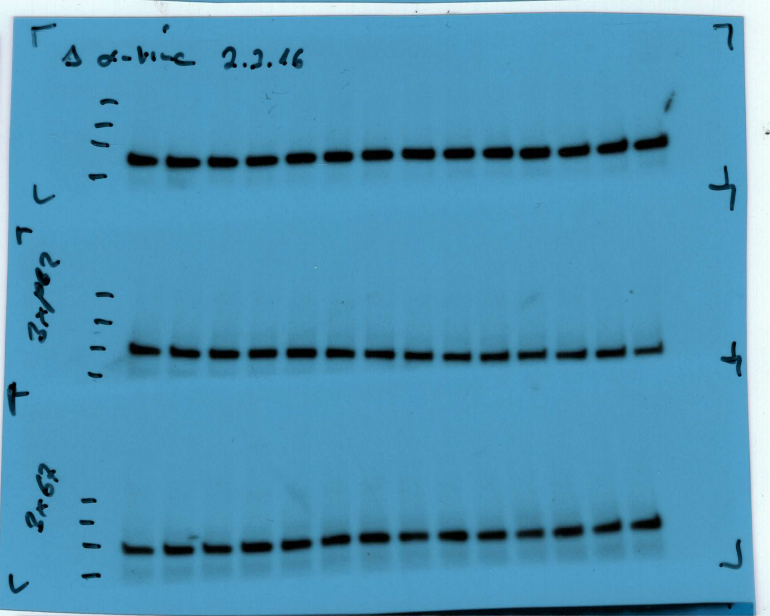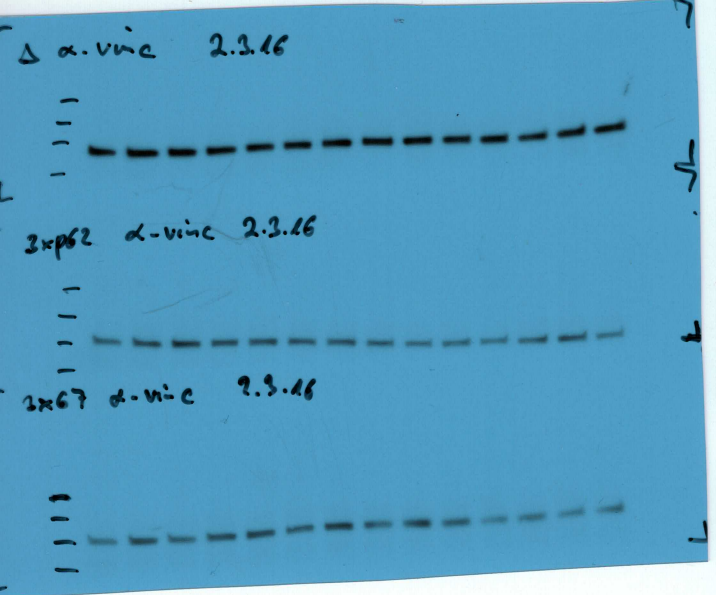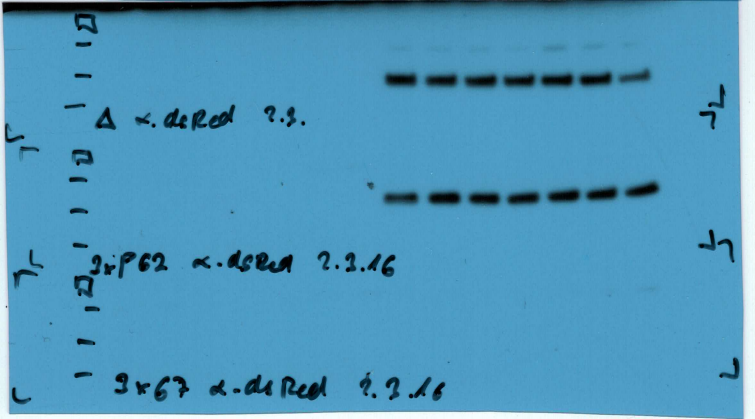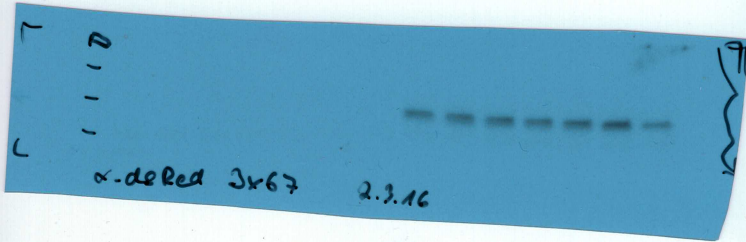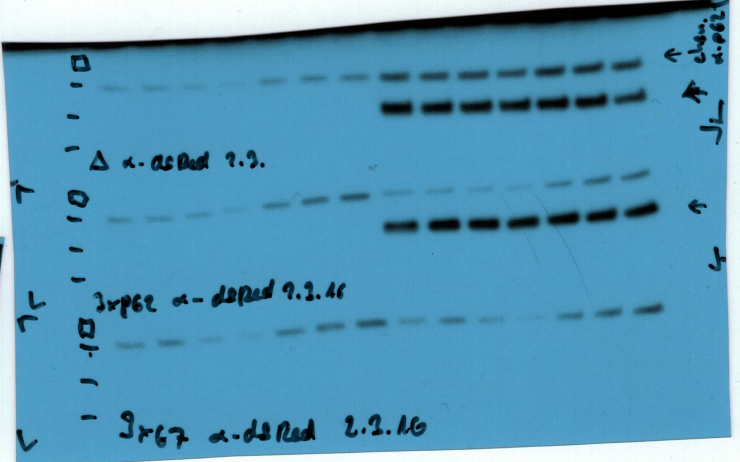



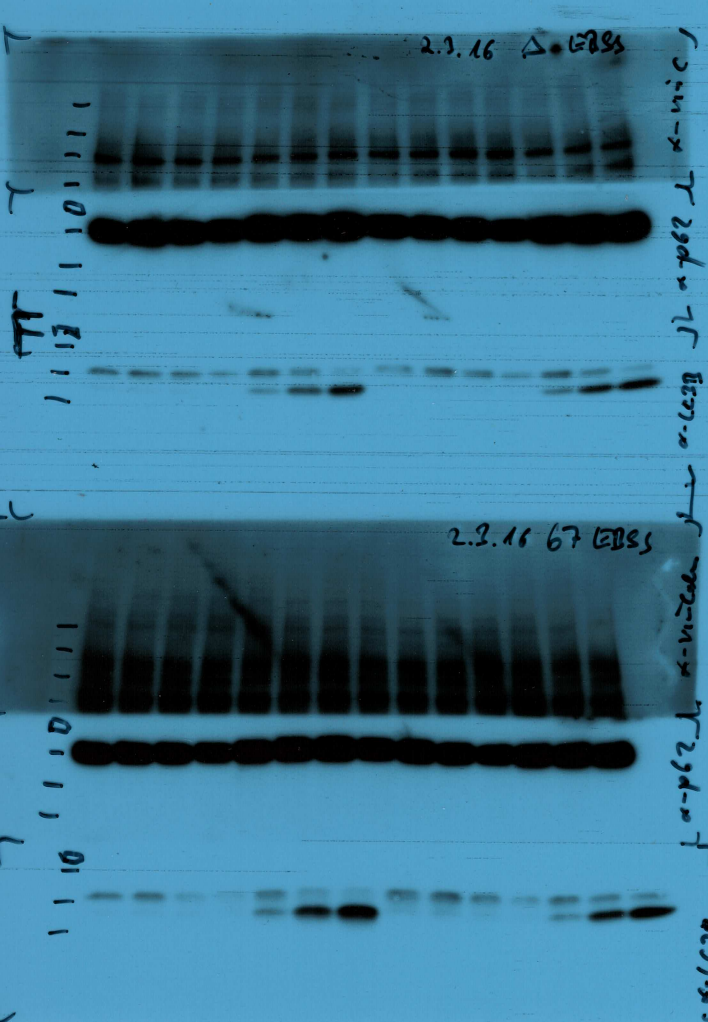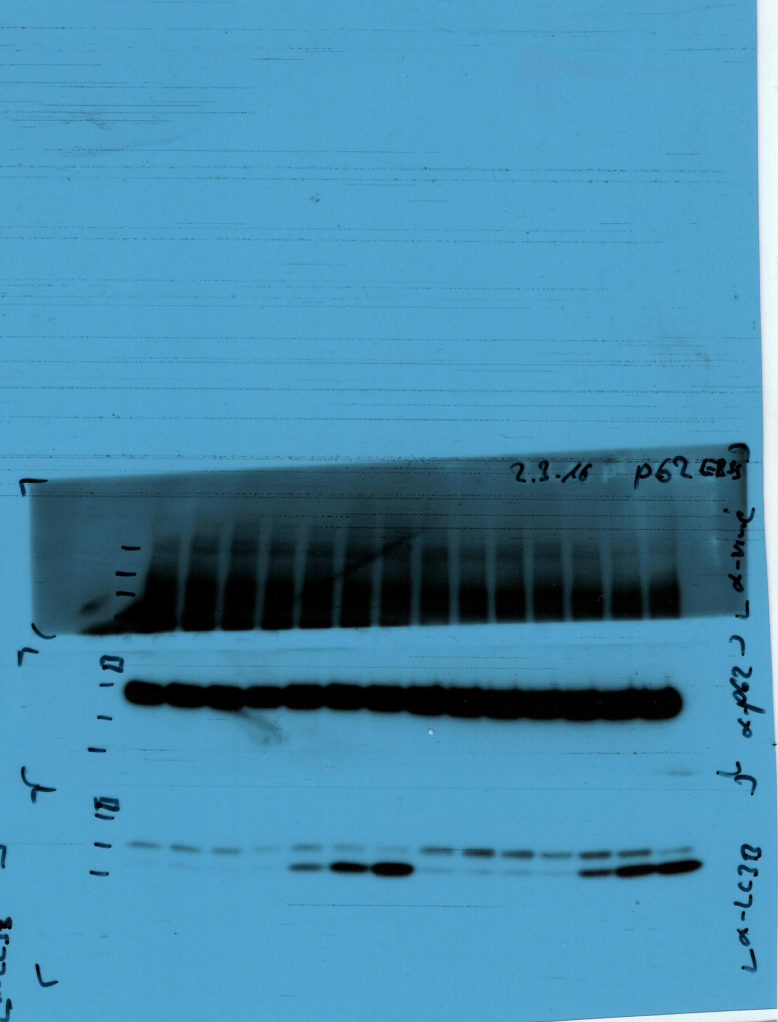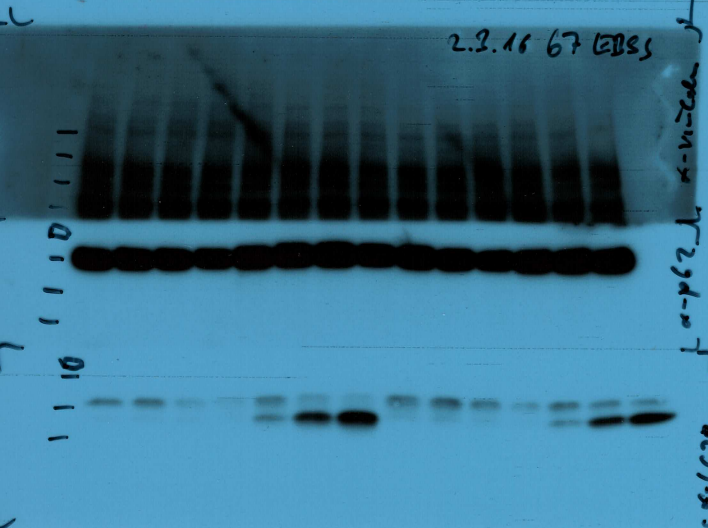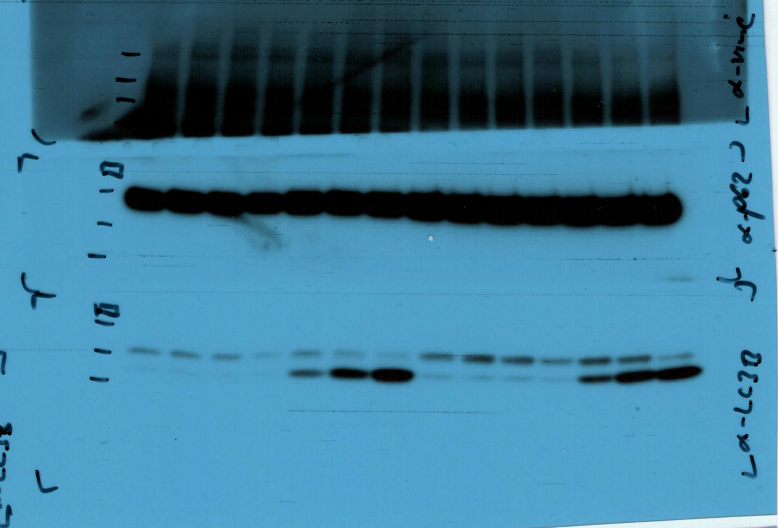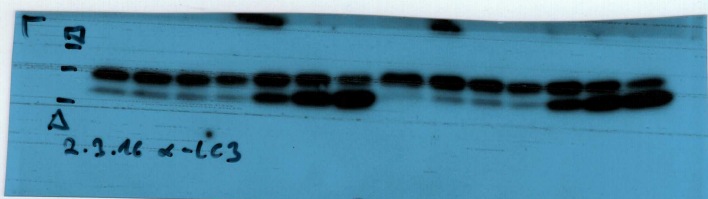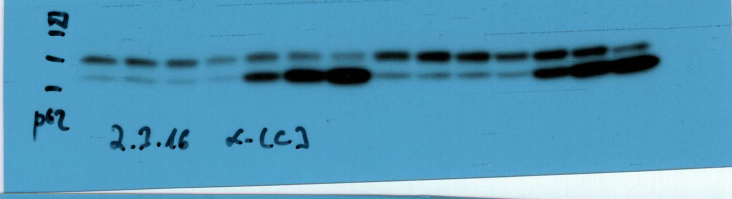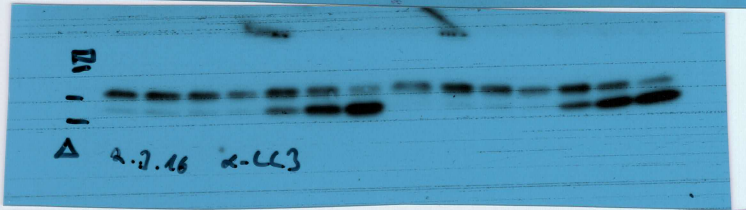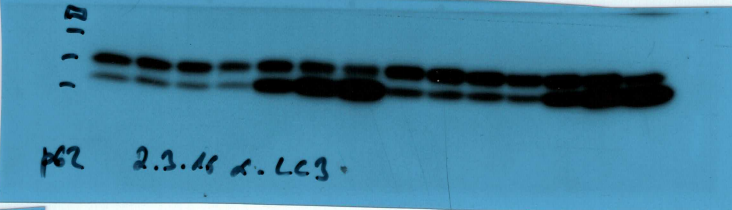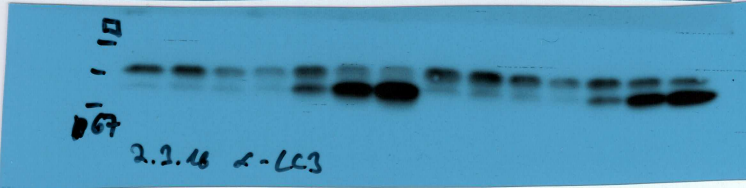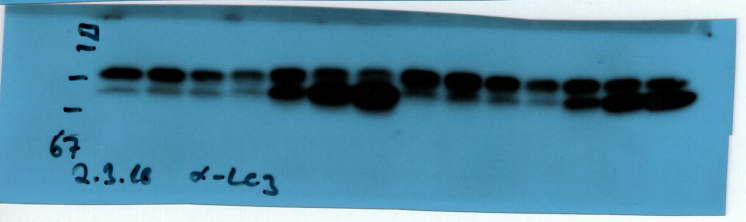



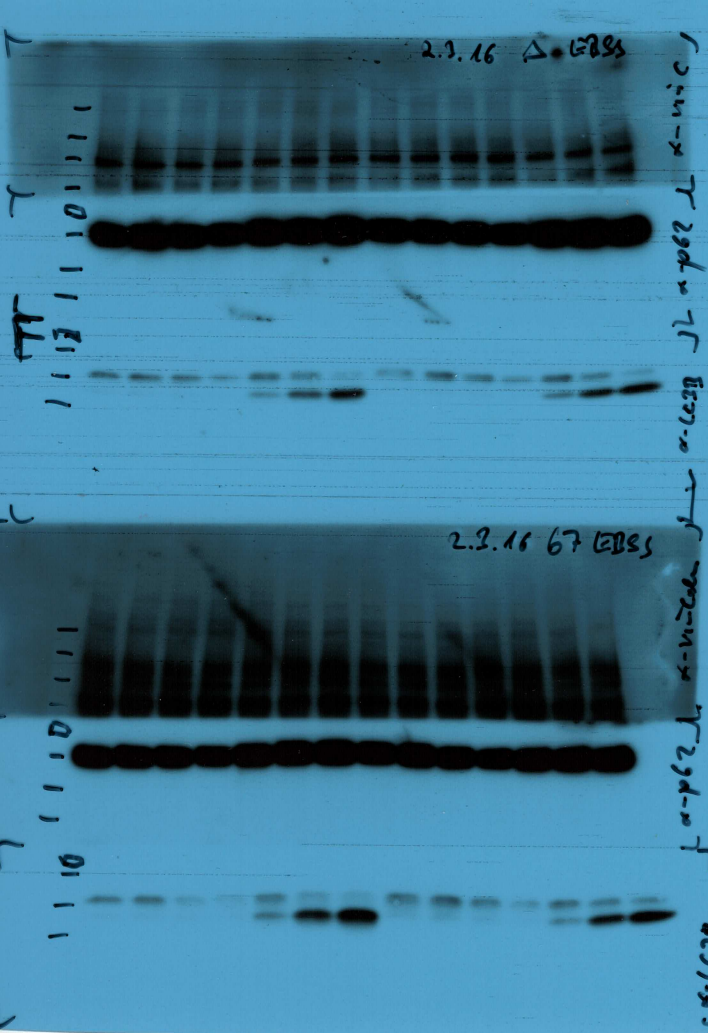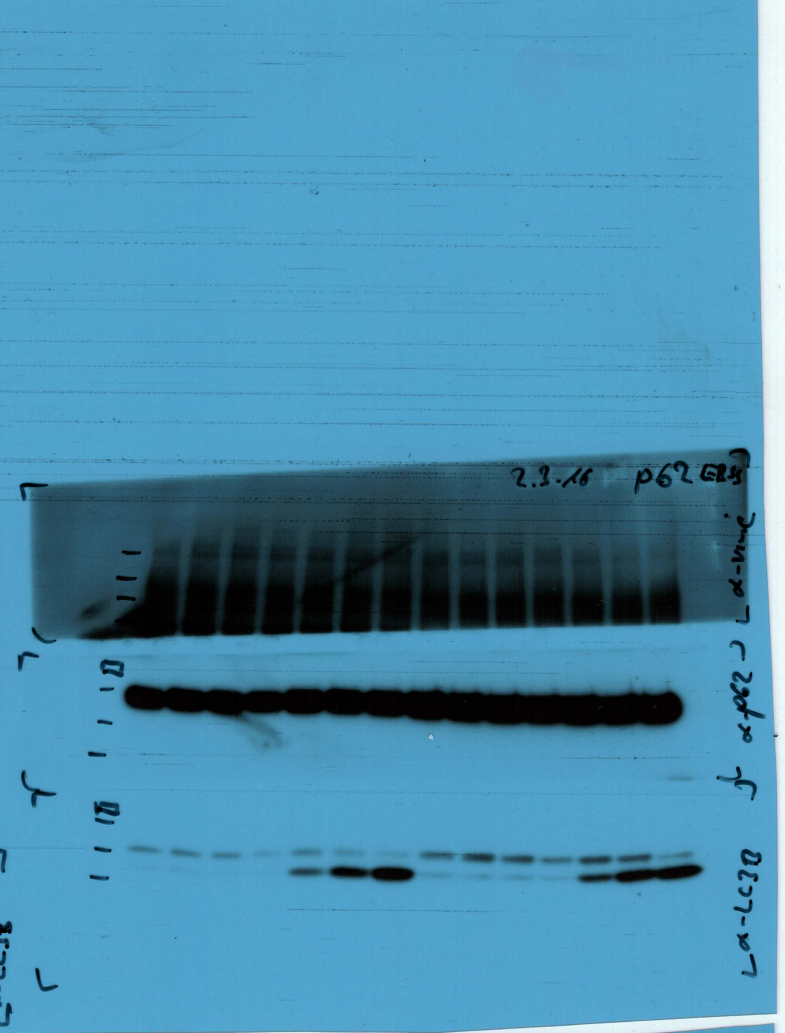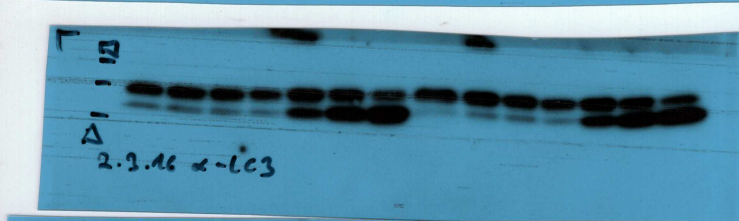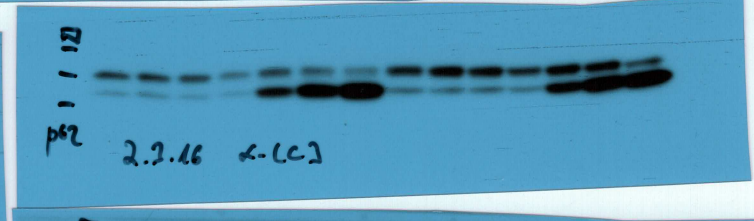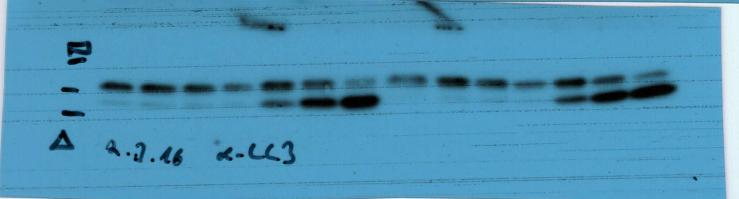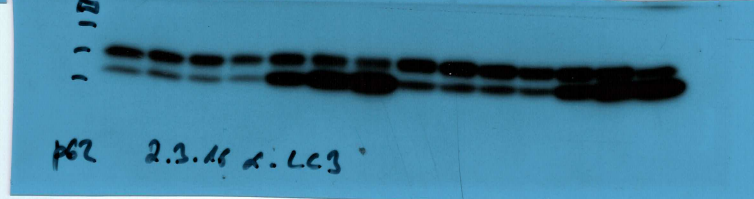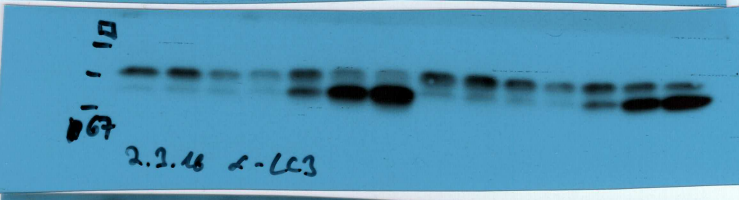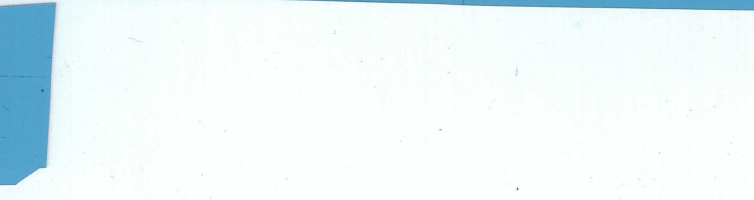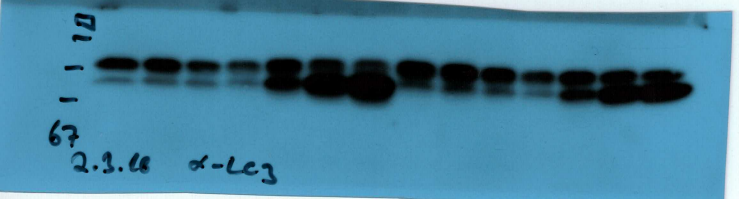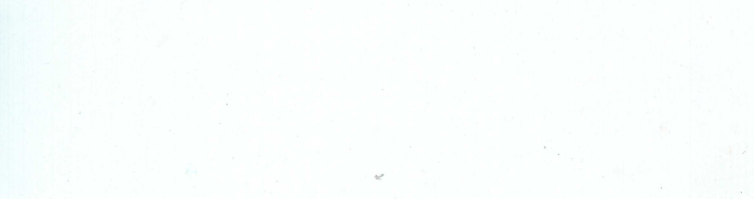



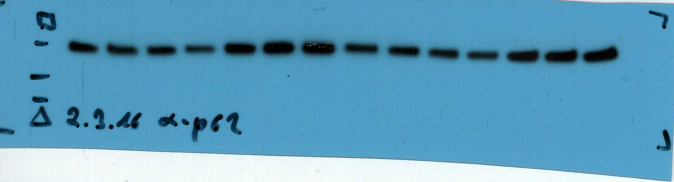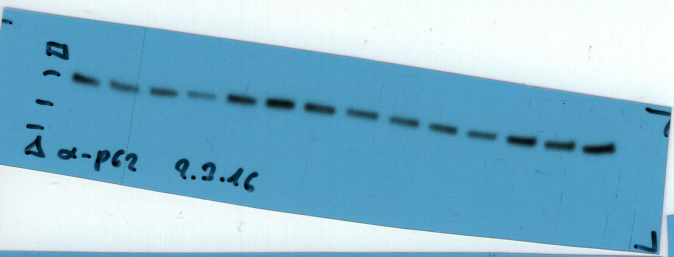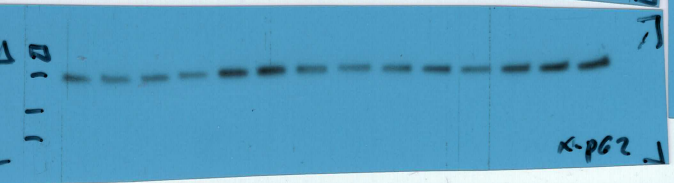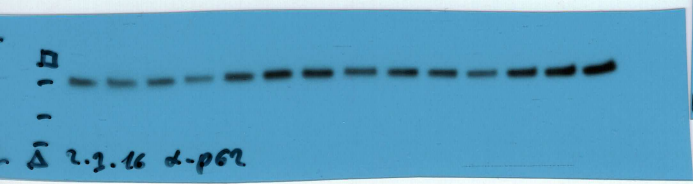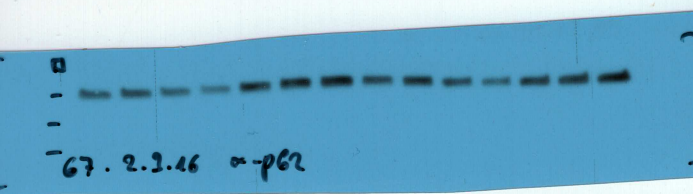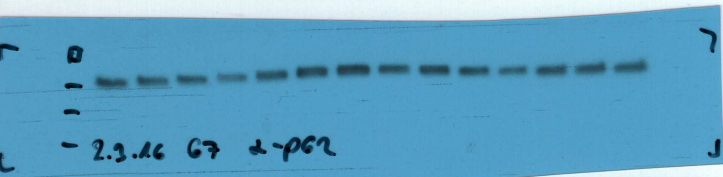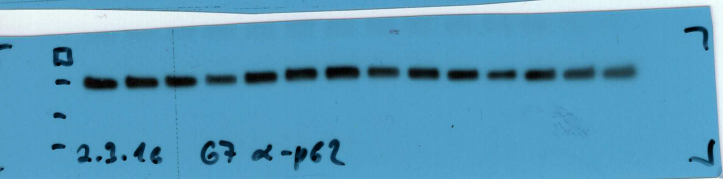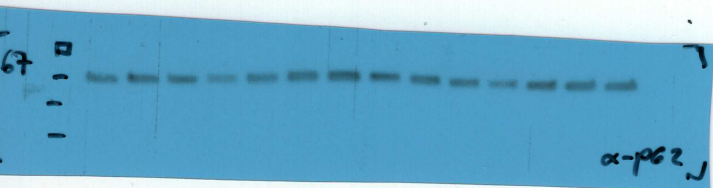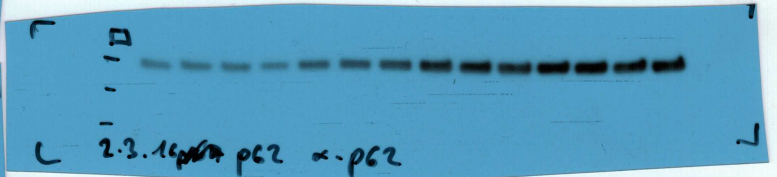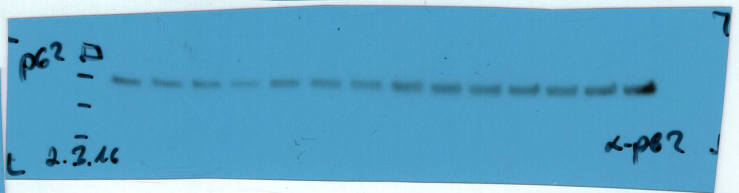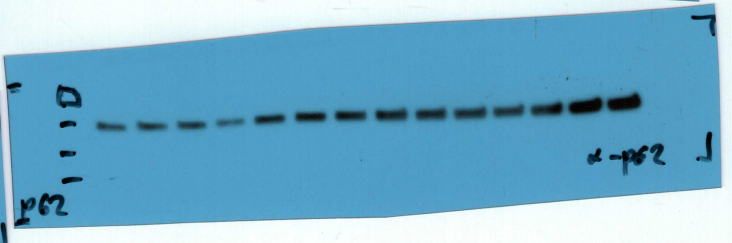



h 0 0 1 2 0 1 2 2 3x67 22.2.16  
Def  
α-vinc  
3x67 α-vinc 22.2.16

Torin 3x67 α-dsRed  
22.2.16  
3x67  
Def  
α-dsRed  
22.2.16

3x67 Def  
3x67 Tor  
22.2.16

3x67 Def α-LC3 22.2.16  
3x67 22.2.16 Torin α-LC3

3x67 Def α-LC3 22.2.  
3x67 Tor 22.2.16 α-LC3

3x67 Def α-LC3 22.2.16  
3x67 Torin 22.2.16 α-LC3

3x67 Def  
22.2.16 α-p62 3x67  
22.2.16 3x67 α-p62 Torin

22.2.16 3x67 Def α-p62  
22.2.16 3x67 Torin α-p62

3x67 Def  
22.2.16  
22.2.16  
3x67 Torin



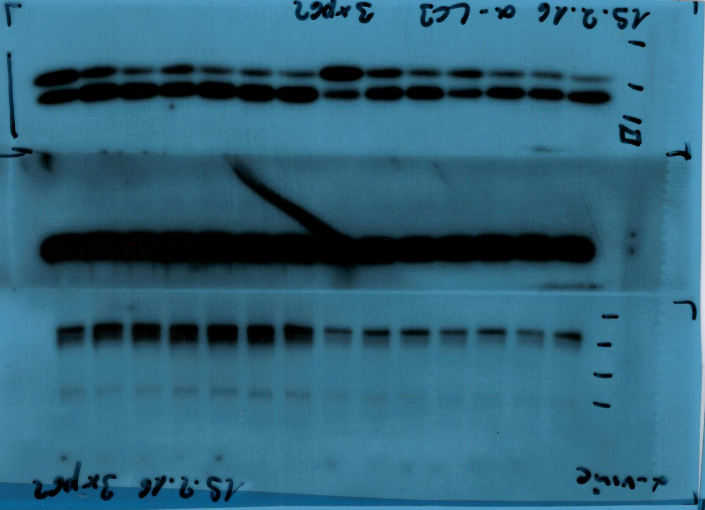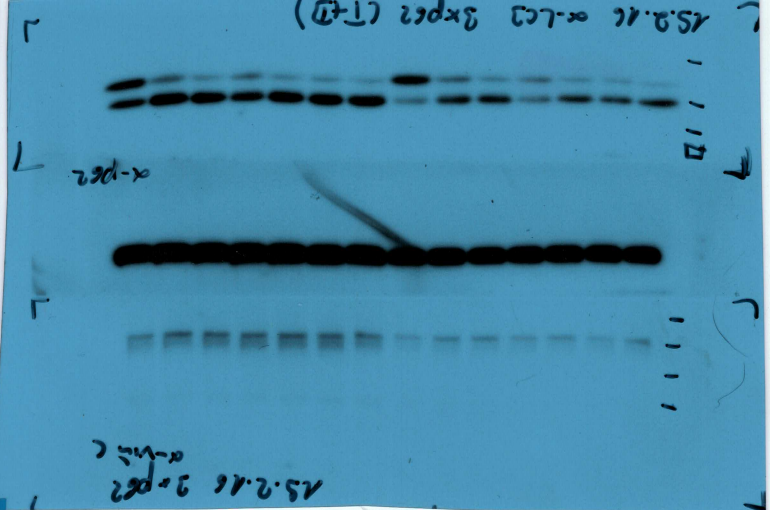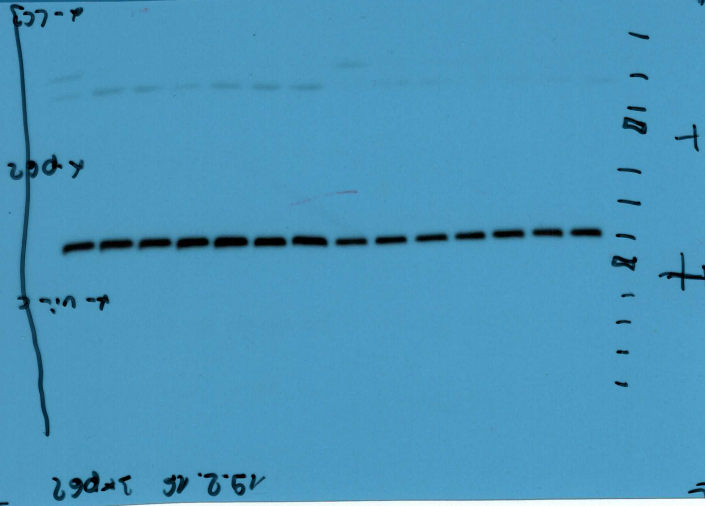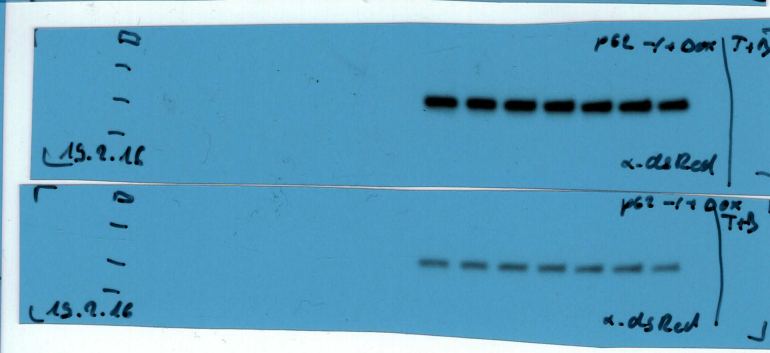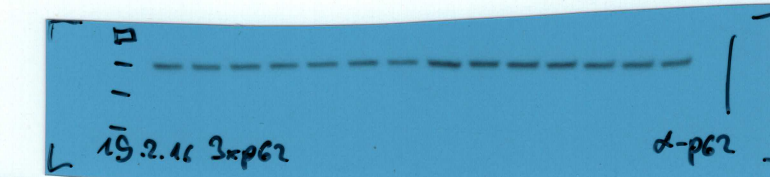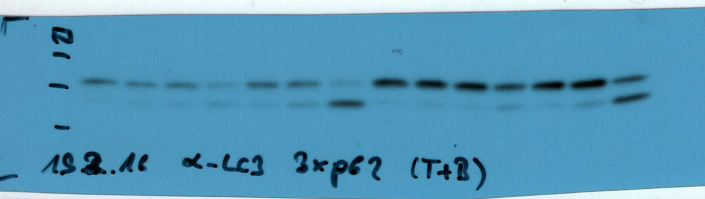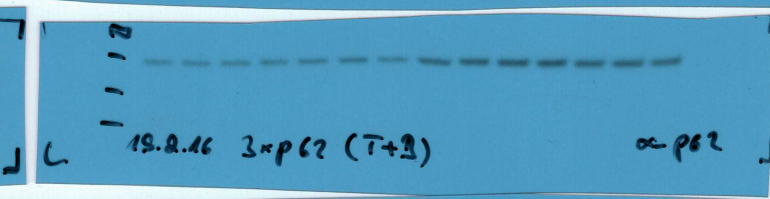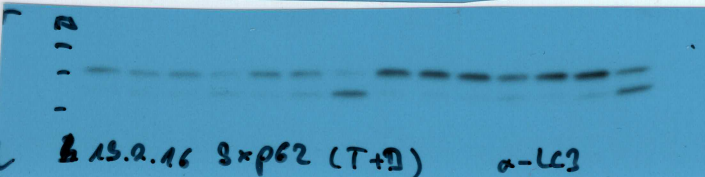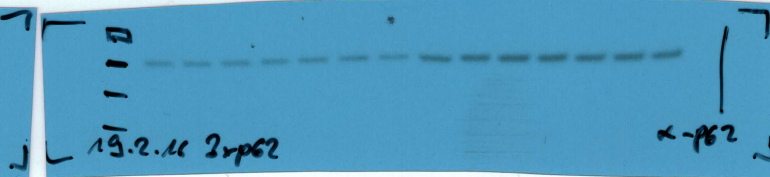



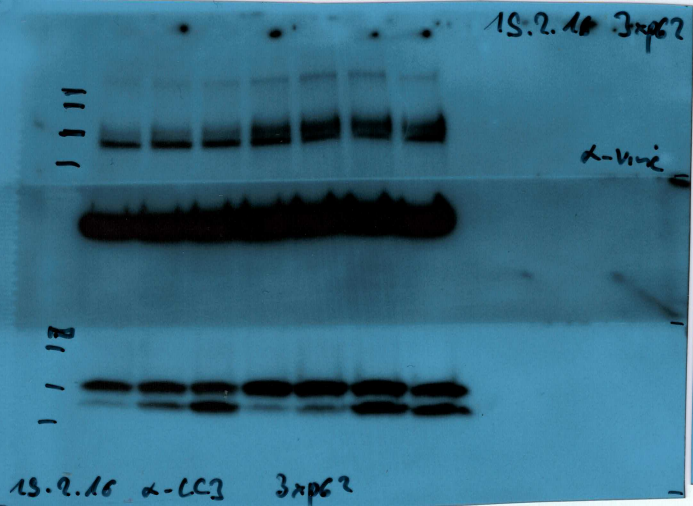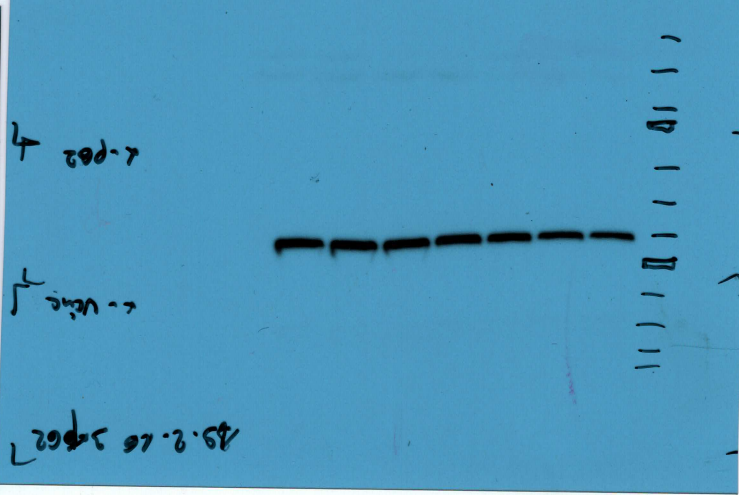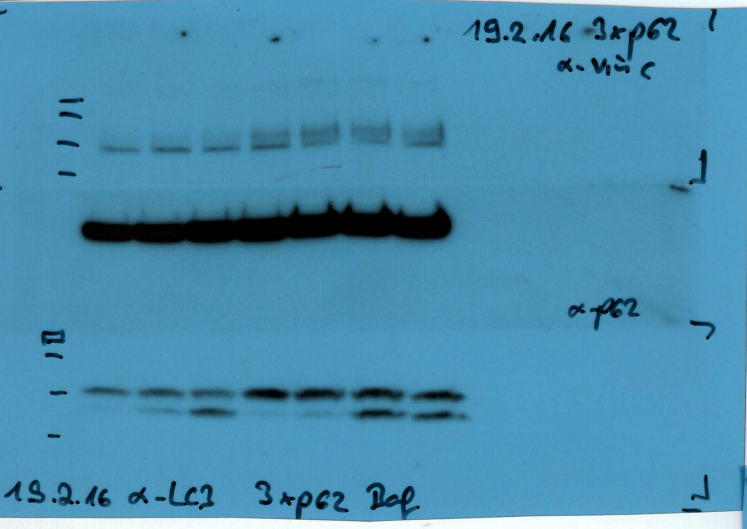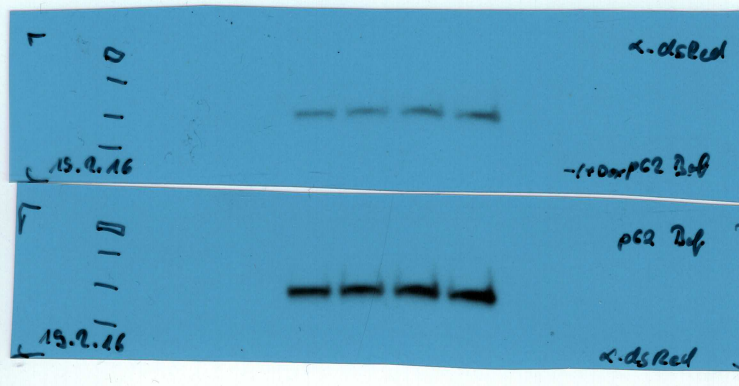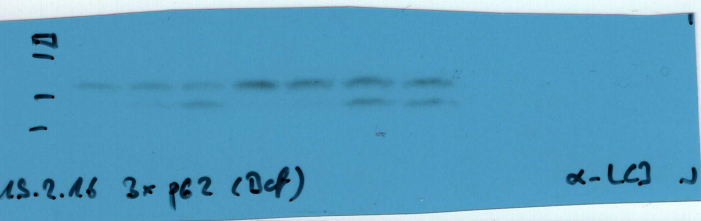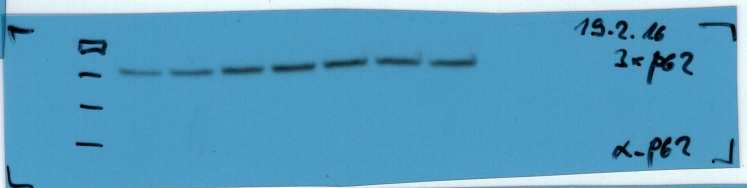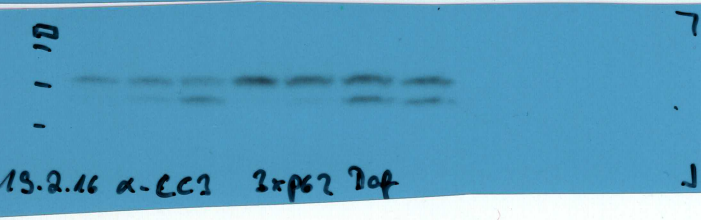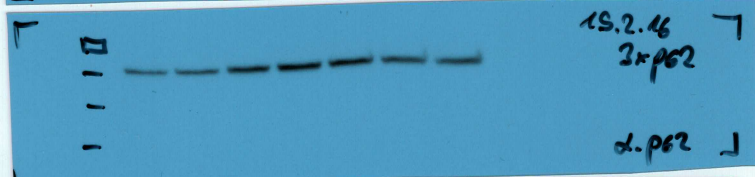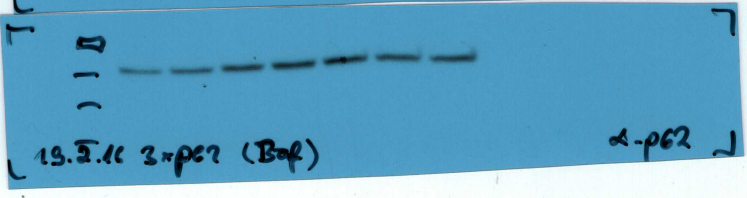

Supplement: EMBJ-36-549-s006.pdf [file EMBJ-36-549-s006.pdf]
